# Supplementary material
Source: PubMed Central journal article supplement (PMC3800003)

Supplementary Figure 1

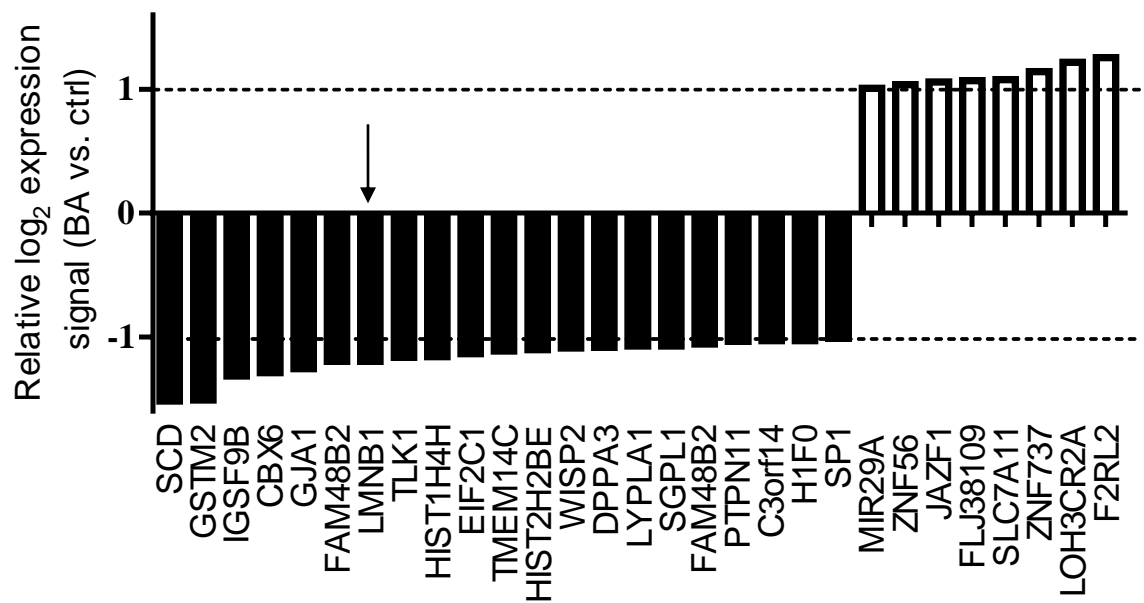

Supplementary Figure 2

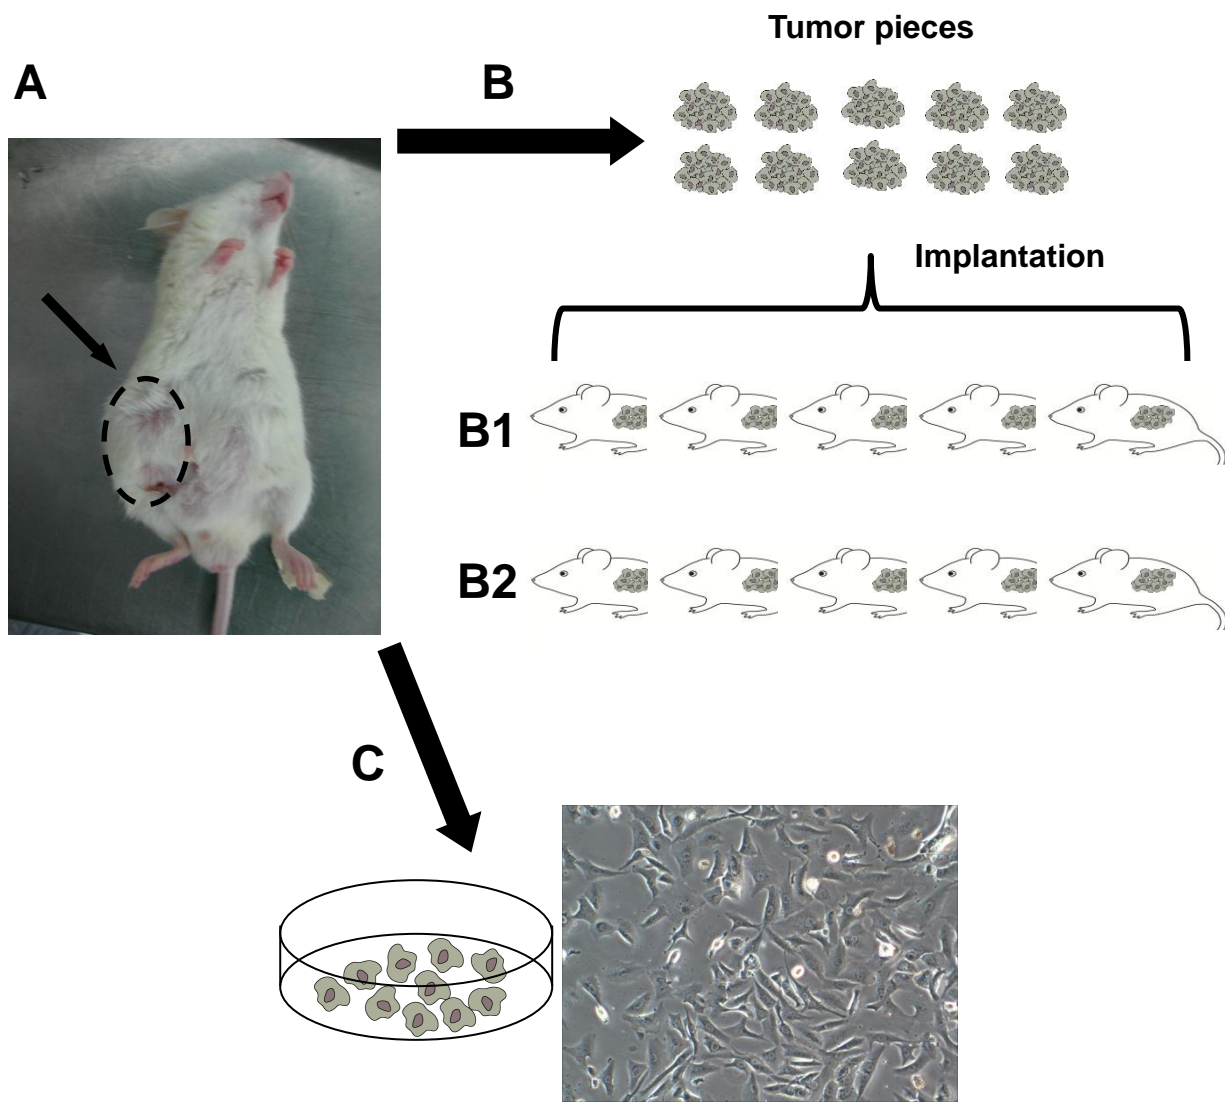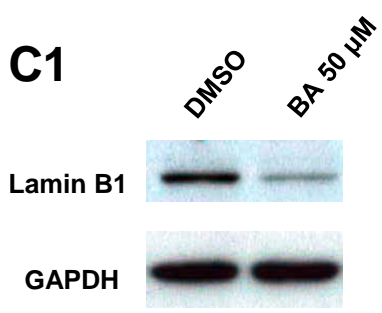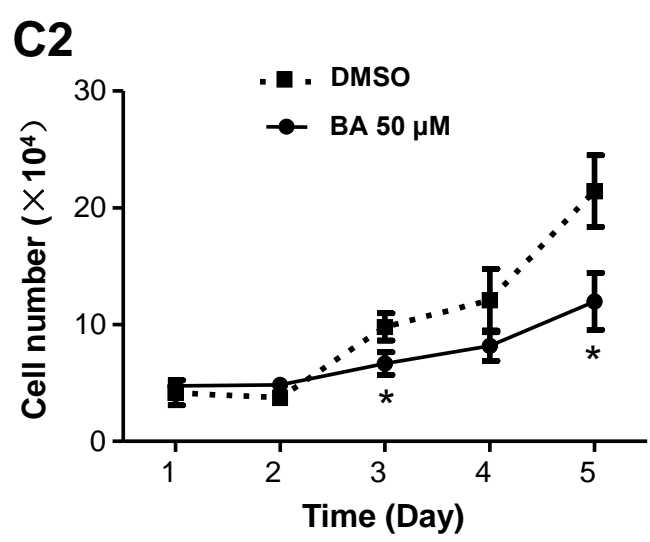

Supplementary Figure 3

**A**

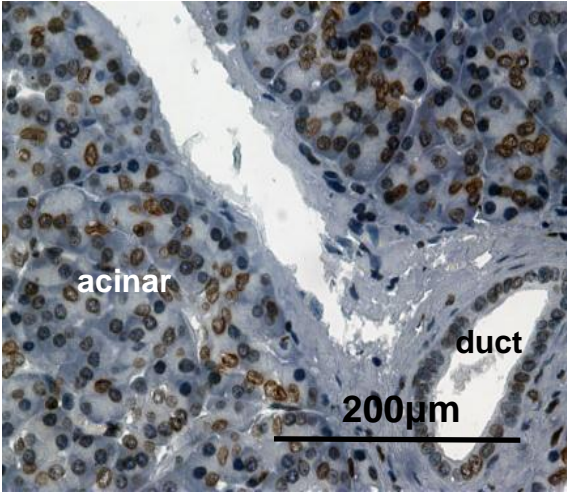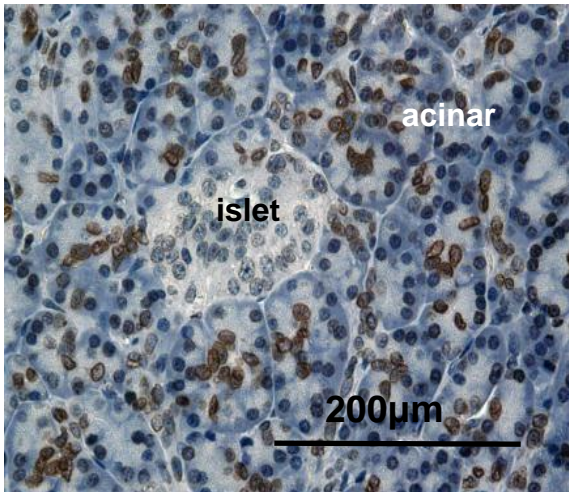

**B**

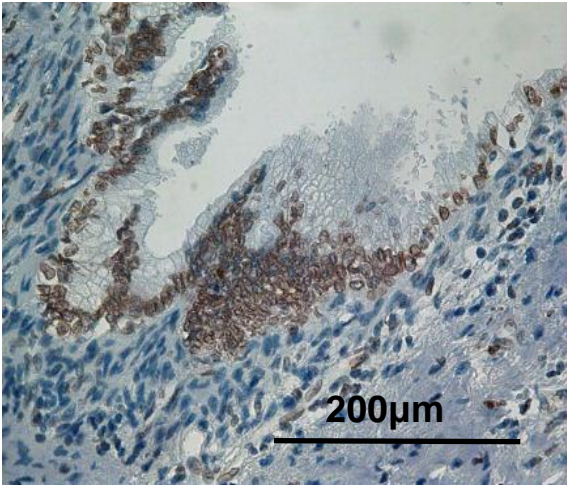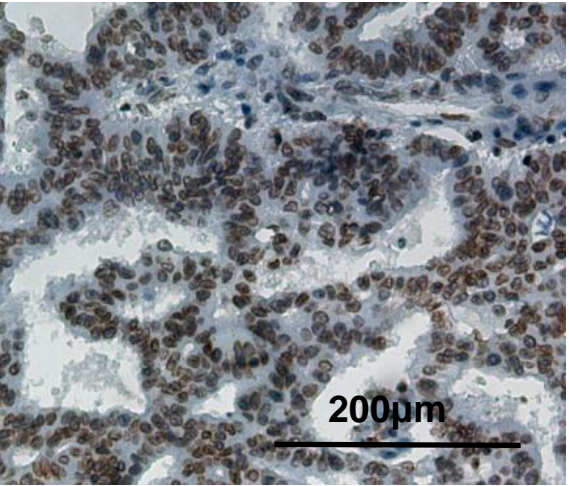

# Supplementary Figure 4

**A**

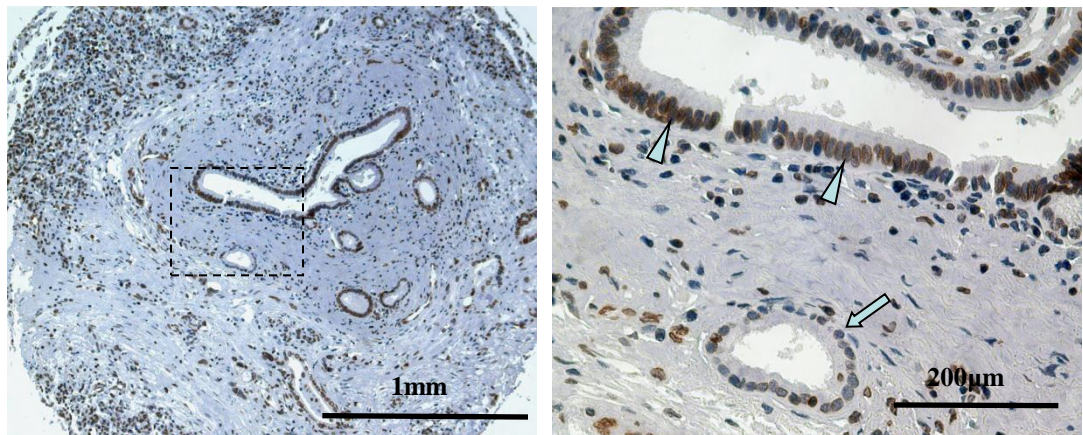

**B**

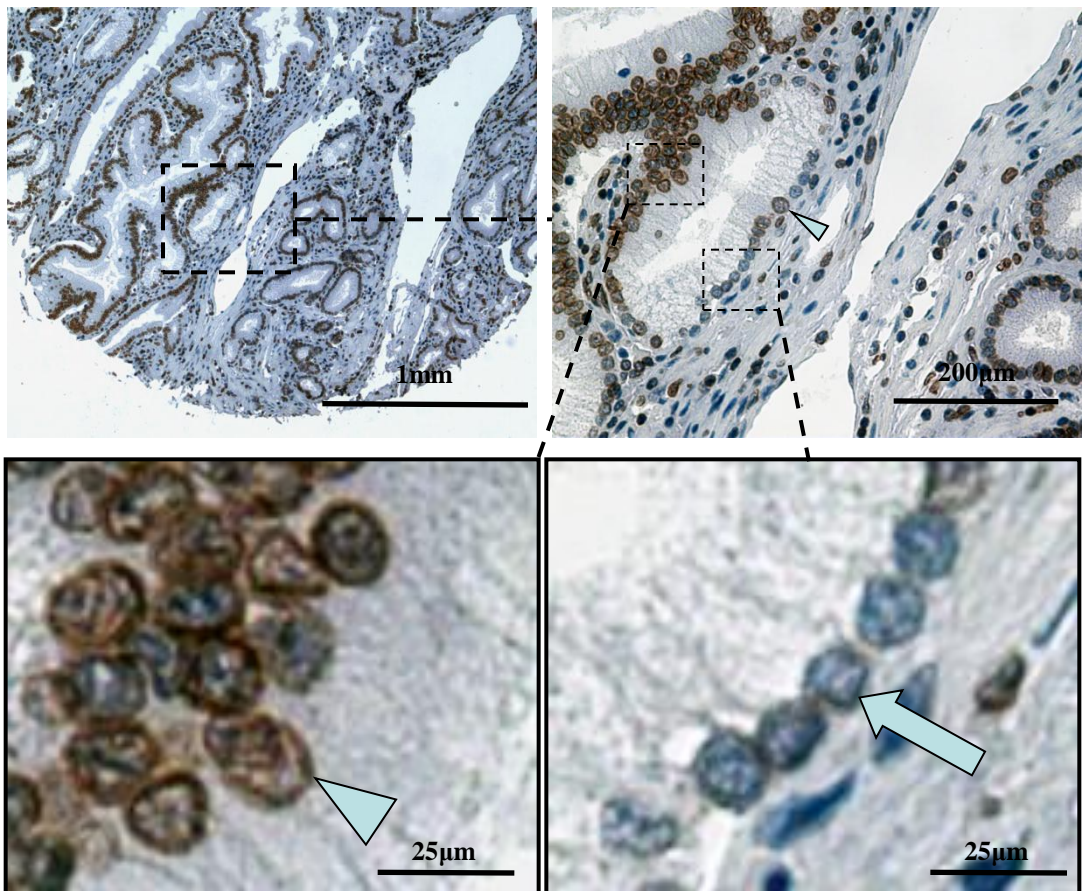

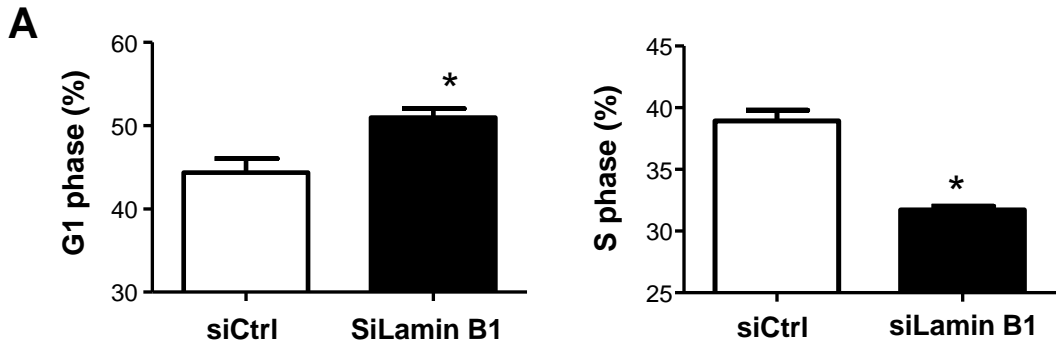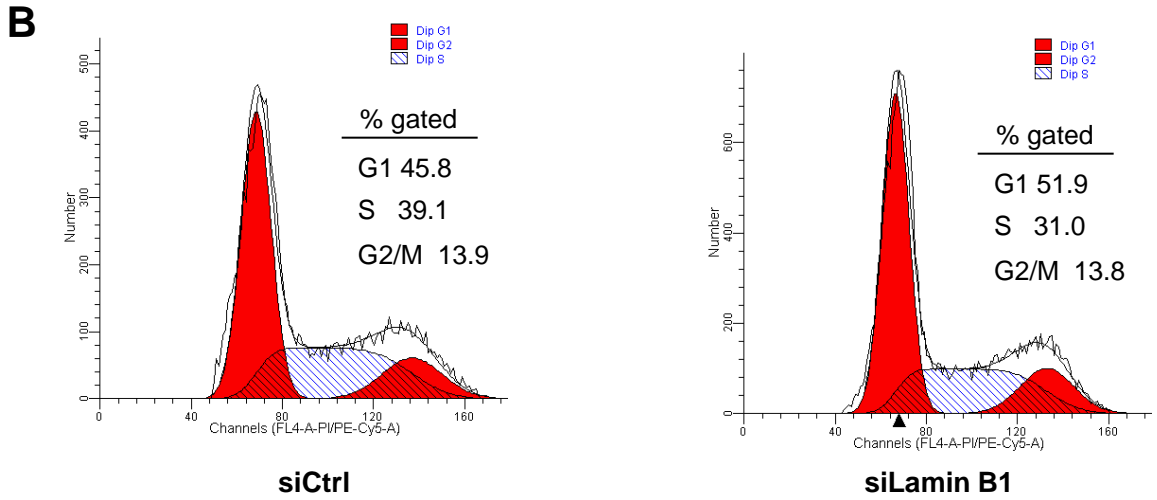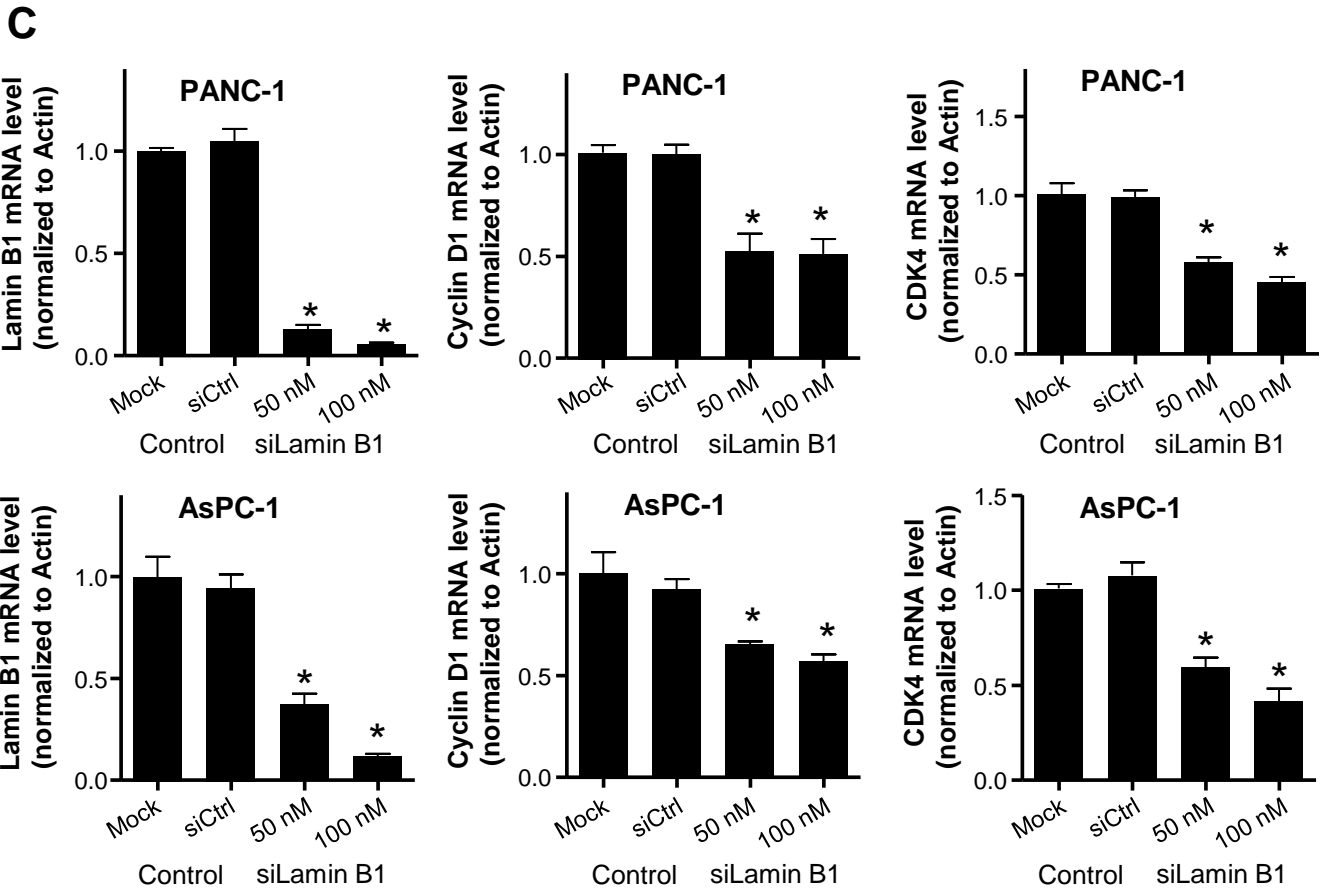

Supplement: NIHMS506745-supplement-2.pdf [file NIHMS506745-supplement-2.pdf]
